# Supplementary figures and images for: RNA Back and Forth: Looking Through Ribozyme and Viroid Motifs
Source: Preprints.org preprint supplement (doi:10.20944/preprints201811.0564.v2), 2019-02-27

# ASBVd (-)

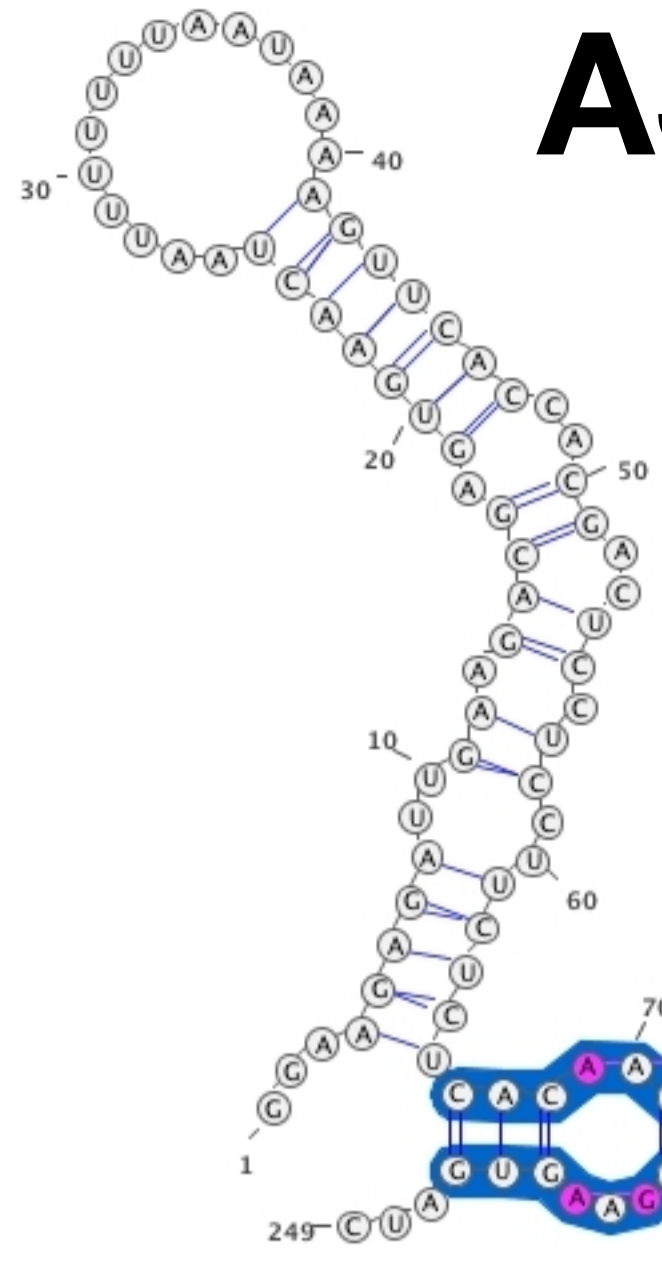

**TGGE**

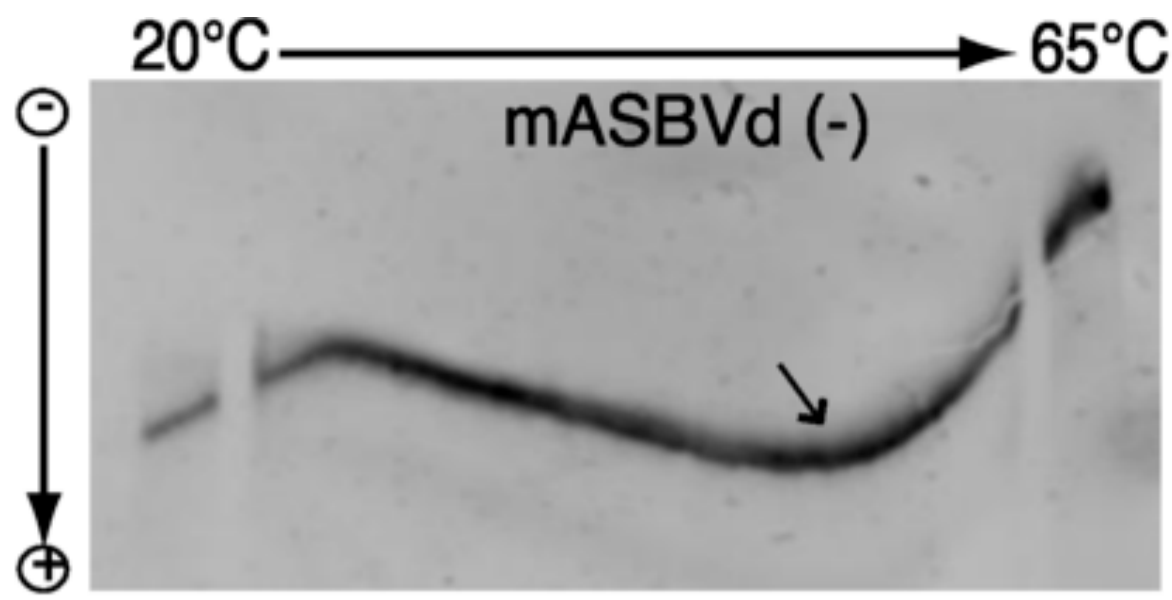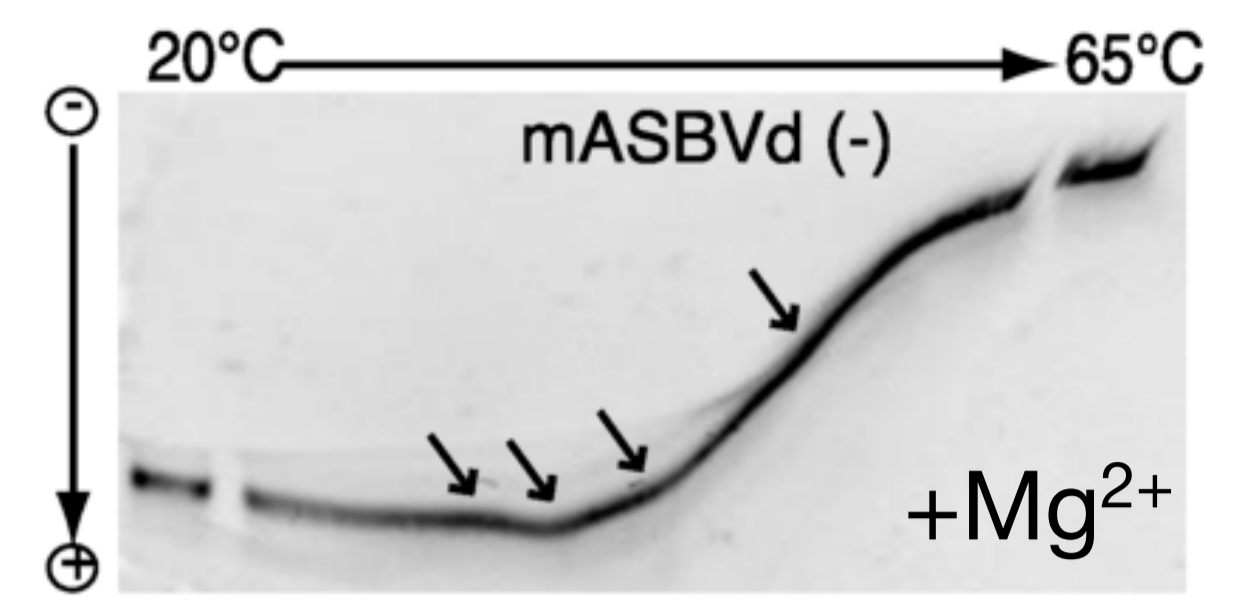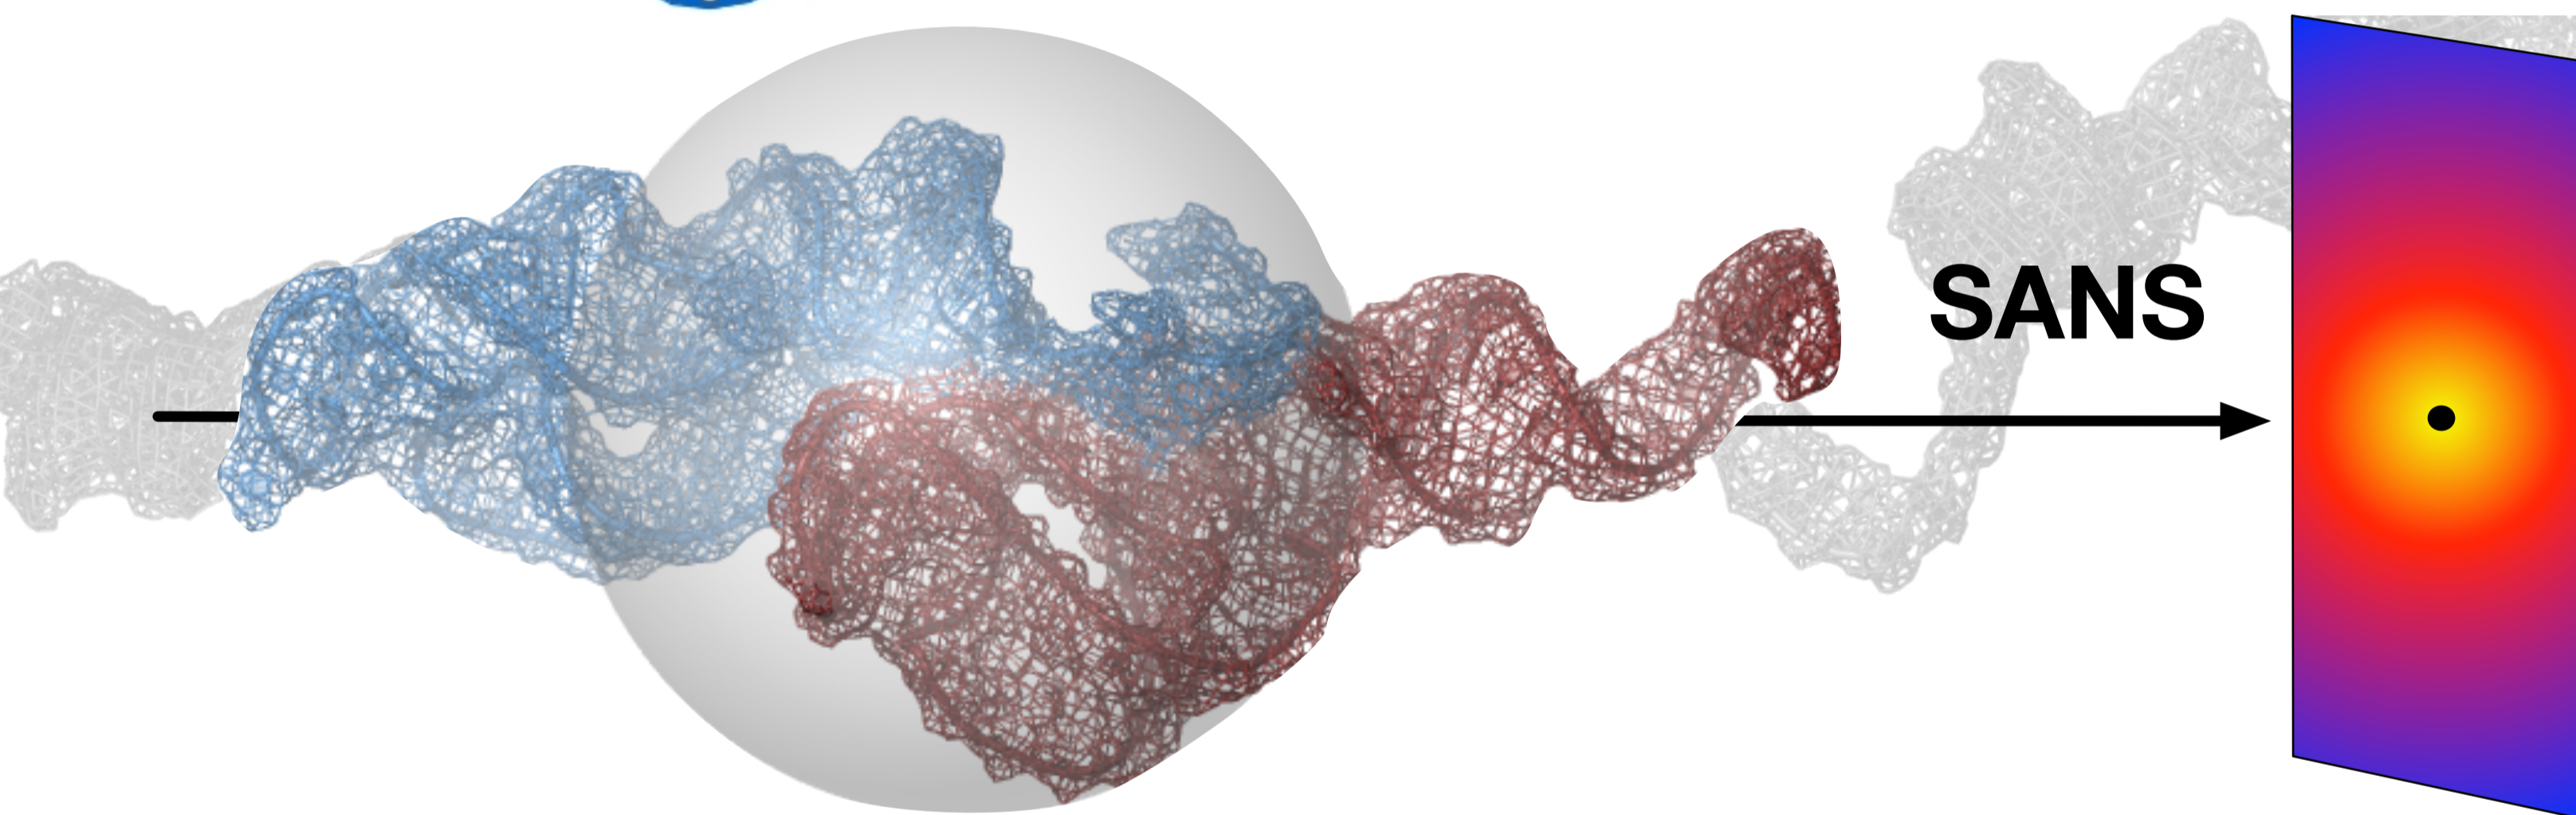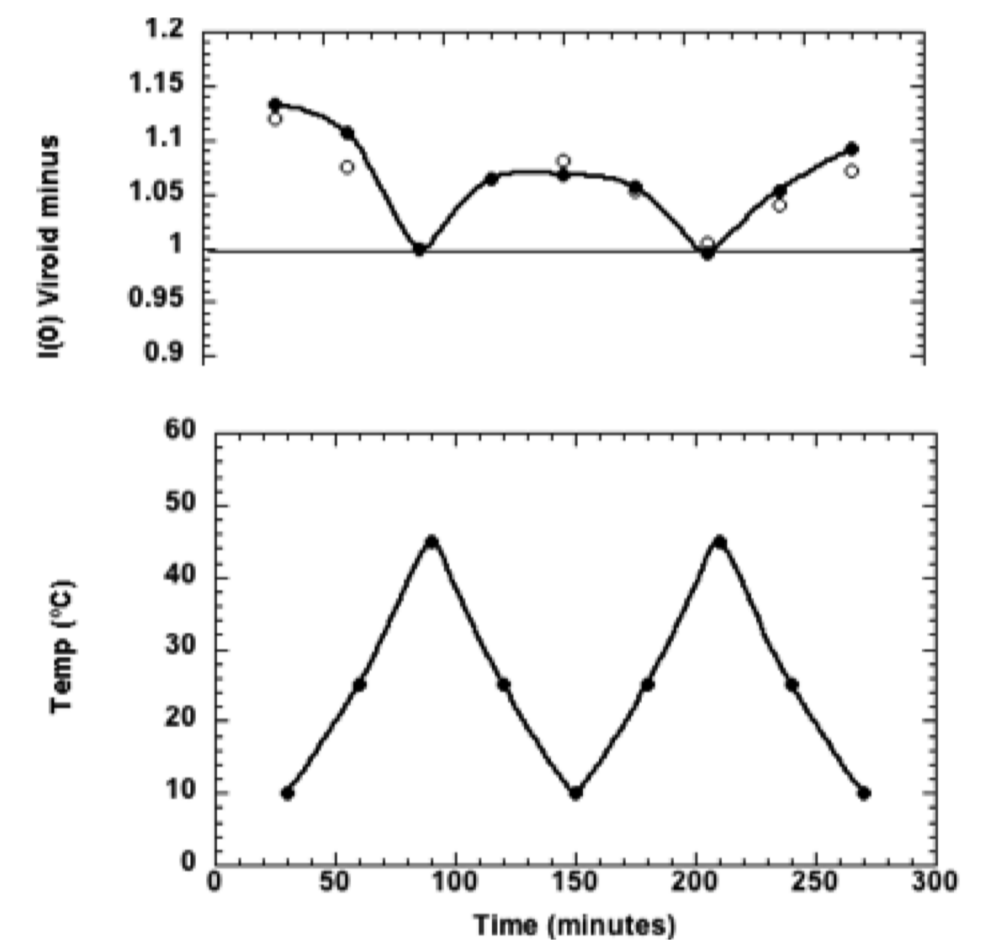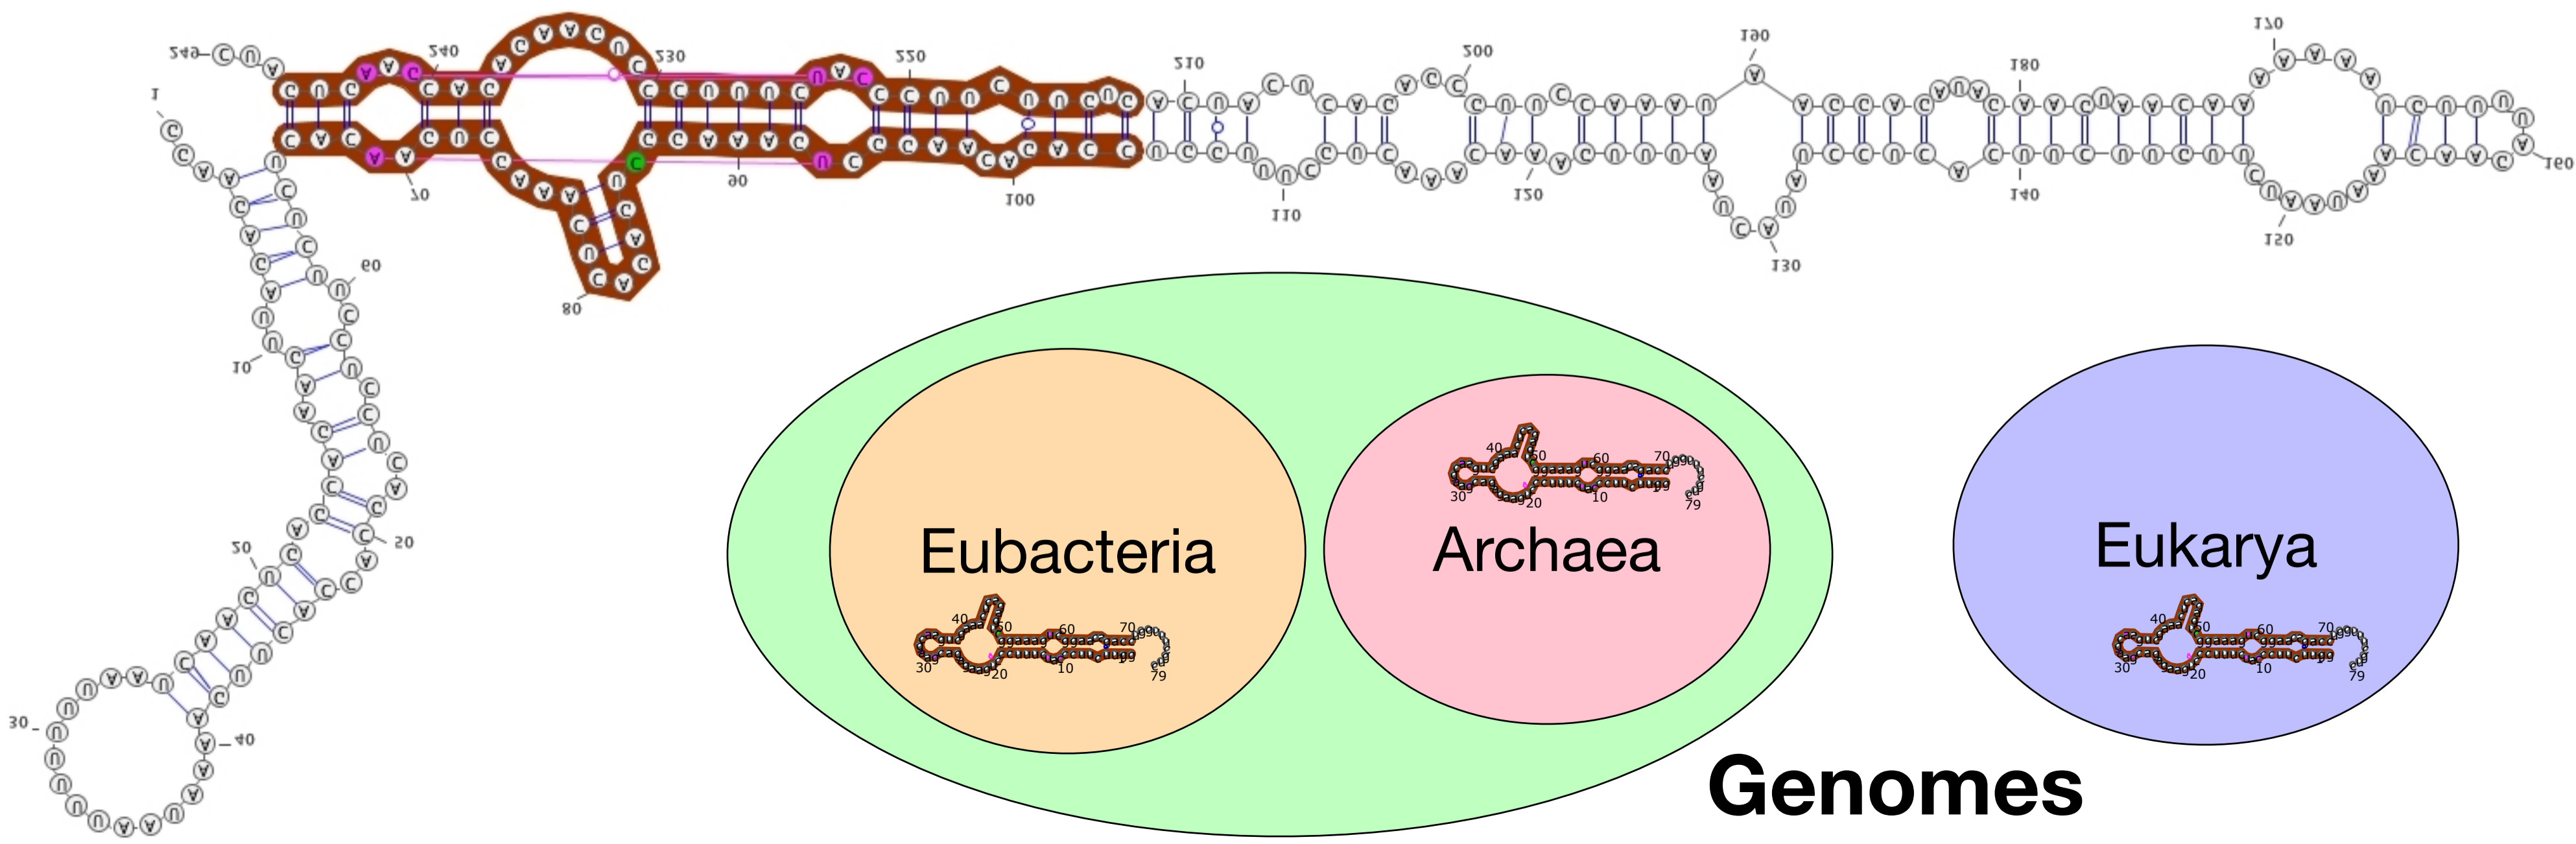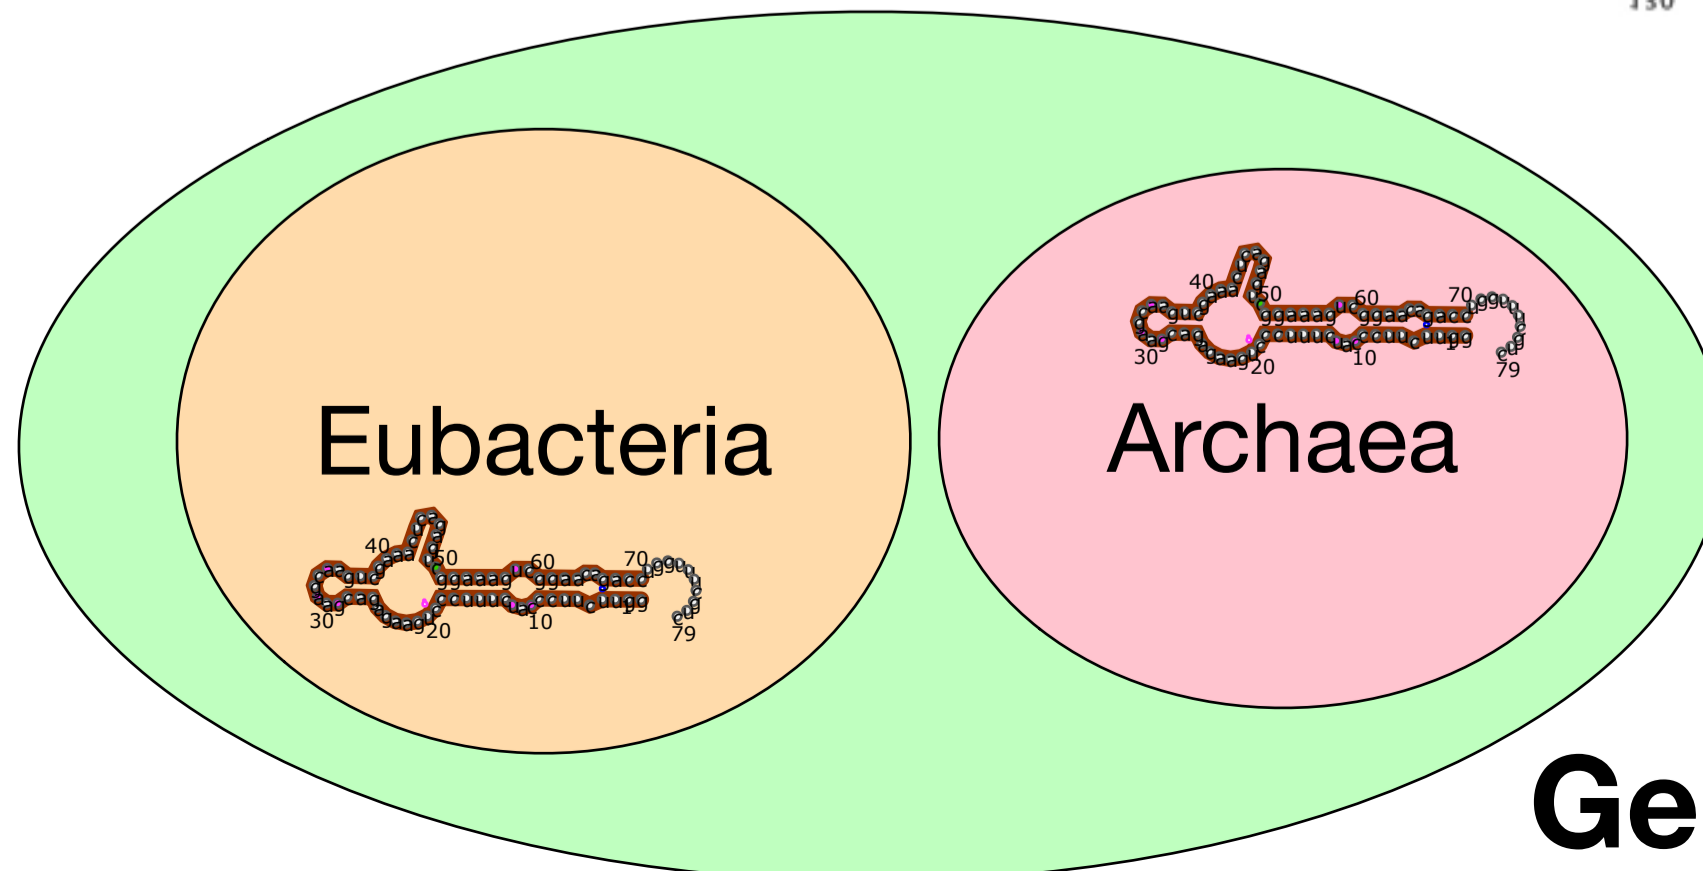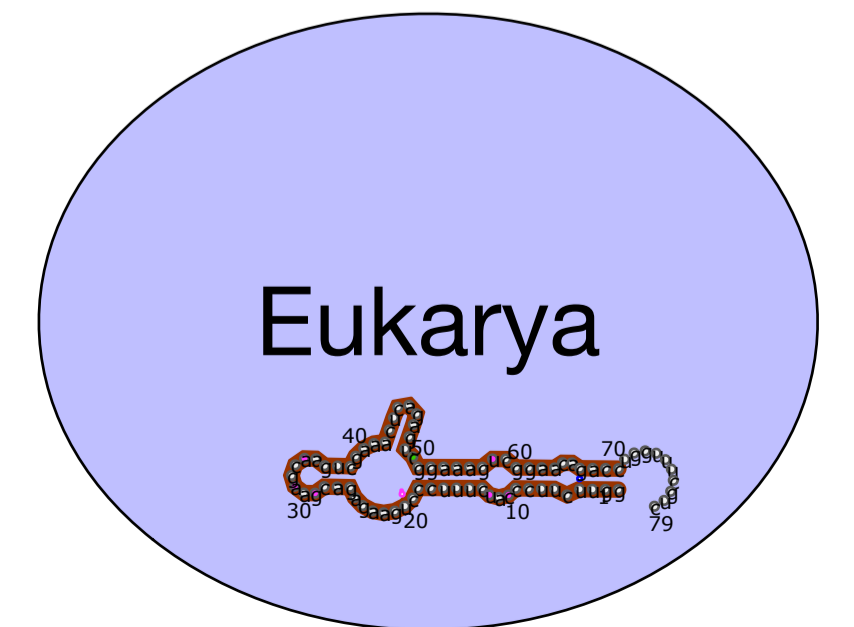

**Genomes**

Supplement: Supplementary file 1 [file supplementary]
